# Supplementary material for: FFPEcap-seq: a method for sequencing capped RNAs in formalin-fixed paraffin-embedded samples
Source: HighWire-hosted journal article supplement (doi:10.1101/gr.249656.119), 2019-10-24
Supplement: Supplemental_protocol.pdf [file Supplemental_protocol.pdf]

## Supplemental protocol for FFPEcap-seq: a method for sequencing capped RNAs in formalin-fixed paraffin-embedded samples

Jeffery M. Vahrenkamp, Kathryn Szczotka, Mark K. Dodson, Elke A. Jarboe, Andrew P. Soisson, and Jason Gertz

FFPE Cap Seq is a protocol designed to allow for the sequencing of 5' ends from highly degraded RNA. Once RNA is available, the entire protocol can easily be completed in a single work day.

### Step 1. Digestion of degraded RNA and rRNA.

In this step we remove RNAs with 5' hydroxyls and phosphates. This includes most rRNAs and RNA degradation products. We use polynucleotide kinase to phosphorylate 5' hydroxyls, and terminator nuclease, a processive 5' to 3' phosphate dependent exonuclease to degrade these products. Transcripts with a 5' cap are protected and thus enriched by this step. We typically see a 70 -95 % reduction in RNA at this step.

**Table 1**

| RNA Digest       |        |
|------------------|--------|
| Reagent          | 1x     |
| Buffer A         | 2      |
| ATP              | 2      |
| PNK              | 2      |
| Terminator       | 1      |
| Super RNase-in   | 1      |
| H <sub>2</sub> O | 12 – X |
| RNA              | X      |
| Total            | 20 µL  |

Each sample is incubated at 30°C for 1 hour, then purified using zymogen RNA clean and concentrate. Sample is eluted in 5 µL of water. 1 µL is used to quantify the remaining RNA and confirm digestion while the other 4 µL are used in the downstream reaction.

### Step 2. Reverse Transcription/ Template Switching

Trehalose-sorbitol solution was made by adding 5 mL of a saturated trehalose solution (Sigma) to 10 mL of 1.28 g/mL sorbitol solution (Sigma). 1 g of celex 100 (Sigma) was added to the solution and vortexed vigorously and allowed to sit for 3 hours at room temperature. The tube was then centrifuged and the supernatant was aliquoted and stored at -30°C. Mix the Reverse Transcription (RT) primer (100 µM) and the template switching (TS) oligo (1mM) with trehalose-sorbitol solution. 1 µL of this primer mix is then combined with the RNA and incubated to unfold the RNA. This RNA/Primer solution is then mixed with the Reverse Transcription master mix to perform reverse transcription.

**Table 2**

| Primer Mix |
|------------|
|------------|

|                                |   |
|--------------------------------|---|
| Trehalose Sorbitol Solution    | 8 |
| RT primer (100 $\mu$ M)        | 1 |
| Template Switching Oligo (1mM) | 1 |

\*This primer mix is sufficient for 10 reactions

Trehalose-Sorbitol solution was mixed with the template switching and reverser transcription oligo and mixed thoroughly by pipetting up and down 20 times.

**Table 3**

| Pre-Incubation |           |
|----------------|-----------|
| Reagent        | 1x        |
| Primer Mix     | 1 $\mu$ L |
| RNA            | 4 $\mu$ L |

RNA and 1  $\mu$ L of the primer mix were mixed and incubated for 10 minutes at 65°C, then placed on ice for at least 2 minutes (.

**Table 4**

| RT Master Mix |               |
|---------------|---------------|
| Reagent       | 1x            |
| 10 mM dNTPs   | 0.625 $\mu$ L |
| 5x RT buff    | 2 $\mu$ L     |
| 5M betaine    | 1.5 $\mu$ L   |
| 200 mM DTT    | 0.5 $\mu$ L   |
| RT            | 1 $\mu$ L     |
| Total         | 5.625 $\mu$ L |

RNA/primer mix and the Reverse transcription master mix were mixed together by pipetting (table 5).

**Table 5**

| Reverse Transcription |                |
|-----------------------|----------------|
| Reagent               | 1x             |
| RNA/primer Mix        | 5 $\mu$ L      |
| RT Master Mix         | 5.625 $\mu$ L  |
| Total                 | 10.625 $\mu$ L |

Samples were mixed with pipetting and then placed into the thermocycler (table 6).

**Table 6**

| Temperature (°C) | Duration   | Cycles |
|------------------|------------|--------|
| 22               | 10 minutes | 1      |
| 40               | 30 minutes |        |

|    |            |
|----|------------|
| 72 | 15 minutes |
| 4  | 2 minutes  |

Samples were purified using AMPure XP at a 1:1.8 sample to bead ratio following standard AMPure protocol and eluted in 40 µL of water.

### Step 3. 2<sup>nd</sup> Strand Synthesis and Amplification

During this step 7.5 µL of cDNA is amplified using PCR (Table 7).

**Table 7**

| 2nd Strand PCR |         |
|----------------|---------|
| Reagent        | 1x      |
| Phusion MM     | 25 µL   |
| 10 µM Primer F | 2.5 µL  |
| 10 µM Primer R | 2.5 µL  |
| cDNA           | 7.5 µL  |
| H2O            | 12.5 µL |
| Total          | 50 µL   |

Samples were mixed by pipetting and placed in the thermocycler (Table 8).

**Table 8**

| Temperature (°C) | Duration   | Cycles |
|------------------|------------|--------|
| 95               | 1 minutes  | 1      |
| 95               | 15 seconds | 24     |
| 65               | 10 seconds |        |
| 68               | 2 minutes  |        |
| 4                | hold       | 1      |

Samples were purified using AMPure XP at a 1:0.8 sample to bead ratio following standard AMPure protocol and eluted into 30 µL of water.

### Step 4. Final library PCR

In this final step we add on the sequence necessary for the cDNA to bind to the Illumina sequencing lane. We quantify the products of the second strand synthesis reaction and add 40 ng of cDNA to the final library PCR reaction (Table 9).

**Table 9**

| Library PCR |    |
|-------------|----|
| Reagent     | 1x |

|                |                |
|----------------|----------------|
| Phusion MM     | 25 µL          |
| 10 uM Primer F | 1.25 µL        |
| 10 uM Primer R | 1.25 µL        |
| DNA            | (40 ng of DNA) |
| H2O            | 22.5 µL -DNA   |
| Total          | 50 µL          |

Samples were mixed by pipetting and placed in the thermocycler (Table 10).

**Table 10**

| Temperature (°C) | Duration   | Cycles |
|------------------|------------|--------|
| 95               | 1 minutes  | 1      |
| 95               | 15 seconds | 2      |
| 55               | 10 seconds |        |
| 68               | 2 minutes  |        |
| 95               | 15 seconds | 9      |
| 65               | 10 seconds |        |
| 68               | 2 minutes  |        |
| 4                | hold       | 1      |

Samples were purified using AMPure XP at a 1:0.8 sample to bead ratio following standard AMPure protocol and eluted into 30 µL of water. Libraries were matched for concentration and submitted for 50 bp single end sequencing on the Illumina HiSeq 2500.
